# Supplementary material for: Testing ‘Proportion of Females Calving’ as an indicator for population-level reproductive performance for black rhinoceros (Diceros bicornis)
Source: PeerJ. 2018 Aug 15;6:e5430. doi: 10.7717/peerj.5430 (PMC6098676; doi:10.7717/peerj.5430)
Supplement: Data S1 [file peerj-06-5430-s001.xlsx]

## Sheet: Sheet1
Year	Female adults	births	PropFC	ASPFC	MASPFC	PopSize	PopSize1	Dens	Dens1	Rain	Rain1
1987	1	0	0	0	0.392699	3	0	0.0136364	0	326.8	356.45
1988	1	1	1	1.5708	1.1781	3	3	0.0136364	0.0136364	452.2	326.8
1989	1	0	0	0	0.392699	4	3	0.0181818	0.0136364	529.85	452.2
1990	3	1	0.333333	0.61548	0.654498	7	4	0.0318182	0.0181818	315.633	529.85
1991	4	2	0.5	0.785398	0.785398	10	7	0.0454545	0.0318182	434.033	315.633
1992	4	2	0.5	0.785398	0.785398	11	10	0.05	0.0454545	246.267	434.033
1993	4	1	0.25	0.523599	0.574183	14	11	0.0636364	0.05	542.9	246.267
1994	5	4	0.8	1.10715	1.05279	15	14	0.0681818	0.0636364	468.233	542.9
1995	6	2	0.333333	0.61548	0.638834	19	15	0.0863636	0.0681818	524.6	468.233
1996	8	1	0.125	0.361367	0.41536	21	19	0.0954545	0.0863636	514.1	524.6
1997	8	4	0.5	0.785398	0.785398	22	21	0.1	0.0954545	447.867	514.1
1998	9	4	0.444444	0.729728	0.735059	39	22	0.177273	0.1	489.467	447.867
1999	9	4	0.444444	0.729728	0.735059	42	39	0.190909	0.177273	396.8	489.467
2000	12	1	0.0833333	0.292843	0.342046	46	42	0.209091	0.190909	533.733	396.8
2001	17	11	0.647059	0.934664	0.926381	46	46	0.209091	0.209091	521.067	533.733
2002	18	3	0.166667	0.420534	0.442659	57	46	0.259091	0.209091	566.933	521.067
2003	20	12	0.6	0.886077	0.881336	59	57	0.268182	0.259091	306.4	566.933
2004	23	8	0.347826	0.630771	0.637269	70	59	0.318182	0.268182	419.55	306.4
2005	25	10	0.4	0.684719	0.688566	77	70	0.35	0.318182	462	419.55
2006	27	15	0.555556	0.841069	0.839107	84	77	0.381818	0.35	572.733	462
2007	27	7	0.259259	0.534226	0.543771	93	84	0.422727	0.381818	436.633	572.733
2008	29	13	0.448276	0.733581	0.735286	98	93	0.445455	0.422727	439.9	436.633
